# Supplementary material for: Genetically encoded conductive protein nanofibers secreted by engineered cells
Source: Royal Society of Chemistry journal article supplement (doi:10.1039/c7ra06289c), 2017-01-01
Supplement: c7ra06289c1.pdf [file c7ra06289c1.pdf]

## SUPPORTING INFORMATION

# Genetically Encoded Conductive Protein Nanofibers Secretion by Engineered Cells

*Ebuzer Kalyoncu<sup>1</sup>, Recep Erdem Ahan<sup>1</sup>, Tolga Tarkan Ölmez<sup>1</sup>, Urartu Özgür Şafak Şeker<sup>1</sup>*

<sup>1</sup>UNAM–National Nanotechnology Research Center and Institute of Materials Science and Nanotechnology, Bilkent University, 06800 Bilkent and Ankara, Turkey.

## Materials and Methods

### 1. Atomic Force Microscopy Images of the Peptides

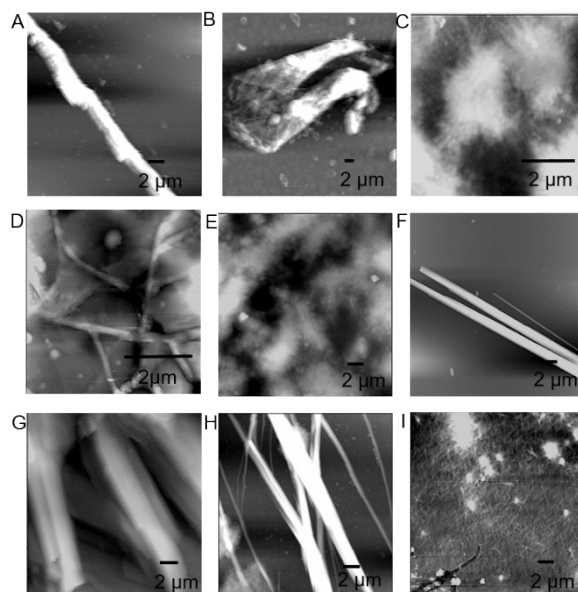

**Figure S1.** Atomic force microscopy (AFM) images of the designed peptides mica respectively: Amyloid like fiber (ALF) (A), ALF3W (B), ALF3Y (C), ALF3H (D), ALF3F (E), R5T (F), R5T3W (G), R5T3Y (H), and R5T3H (I).

### 2. Cloning of the CsgA Conductive Peptides

csgAW, csgAY, csgAWY and csgAYW gene fragments listed in Supplementary Table 1 were amplified from pZa-tetO-csgA-CmR (primers were listed in Supplementary Table 2). Recombinant genes were cloned into pZa-

tetO-CmR through the cut ligate method using kpnI/mluI restriction sites and the plasmid constructs are represented in Figure S2, S4, S6, and S8 and sequence alignments of the constructs are shown in Figure S3, S5, S7, and S9.

**Table 1-** Gene sequences of the PCR Products

| Gene Fragment | Sequence                                                                                                                                                                                                                                                                                                                                                                                                                                                                                                                               |
|---------------|----------------------------------------------------------------------------------------------------------------------------------------------------------------------------------------------------------------------------------------------------------------------------------------------------------------------------------------------------------------------------------------------------------------------------------------------------------------------------------------------------------------------------------------|
| <b>CsgAW</b>  | GGTACCATGAAACTTTTAAAAGTAGCAGCAATTGCAGCAATCGTATTCTCCGGTAGCGCTCTGGCAGGTGTTGTTCTCA<br>GTACGGCGGCGCGGTAACCACGGTGGTGGCGGTAATAATAGCGGCCAAATTCTGAGCTGAACATTTACCAGTACGG<br>TGGCGGTAACCTGCACTTGCTCTGCAAAGTATGCCCCGTAACCTGACTTGACTATTACCAGCATGGCGGCGGTAATG<br>GTGCAGATGTTGGTCAGGGCTCAGATGACAGCTCAATCGATCTGACCCAACGTGGCTTCGGTAACAGCGCTACTCTTGAT<br>CAGTGGAACGGCAAAAATTCTGAAATGACGGTTAAACAGTTCGGTGGTGGCAACGGTGTGCAGTTGACCAGACTGCA<br>TCTAACTCCTCCGTCAACGTGACTCAGGTTGGCTTTGGTAACAACGCGACCGCTCATCAGTACTGGTGGCGTAAATGGAA<br>AGAATGGGATGACTGGTAAACGCGT |
| <b>CsgAY</b>  | GGTACCATGAAACTTTTAAAAGTAGCAGCAATTGCAGCAATCGTATTCTCCGGTAGCGCTCTGGCAGGTGTTGTTCTCA<br>GTACGGCGGCGCGGTAACCACGGTGGTGGCGGTAATAATAGCGGCCAAATTCTGAGCTGAACATTTACCAGTACGG<br>TGGCGGTAACCTGCACTTGCTCTGCAAAGTATGCCCCGTAACCTGACTTGACTATTACCAGCATGGCGGCGGTAATG<br>GTGCAGATGTTGGTCAGGGCTCAGATGACAGCTCAATCGATCTGACCCAACGTGGCTTCGGTAACAGCGCTACTCTTGAT<br>CAGTGGAACGGCAAAAATTCTGAAATGACGGTTAAACAGTTCGGTGGTGGCAACGGTGTGCAGTTGACCAGACTGCA<br>TCTAACTCCTCCGTCAACGTGACTCAGGTTGGCTTTGGTAACAACGCGACCGCTCATCAGTACTACTATCGAAATACAAA<br>GAGTATGATGACTACTAAACGCGT  |
| <b>CsgAWY</b> | GGTACCATGAAACTTTTAAAAGTAGCAGCAATTGCAGCAATCGTATTCTCCGGTAGCGCTCTGGCAGGTGTTGTTCTCA<br>GTACGGCGGCGCGGTAACCACGGTGGTGGCGGTAATAATAGCGGCCAAATTCTGAGCTGAACATTTACCAGTACGG<br>TGGCGGTAACCTGCACTTGCTCTGCAAAGTATGCCCCGTAACCTGACTTGACTATTACCAGCATGGCGGCGGTAATG<br>GTGCAGATGTTGGTCAGGGCTCAGATGACAGCTCAATCGATCTGACCCAACGTGGCTTCGGTAACAGCGCTACTCTTGAT<br>CAGTGGAACGGCAAAAATTCTGAAATGACGGTTAAACAGTTCGGTGGTGGCAACGGTGTGCAGTTGACCAGACTGCA<br>TCTAACTCCTCCGTCAACGTGACTCAGGTTGGCTTTGGTAACAACGCGACCGCTCATCAGTACTACTATCGAAATACAAA<br>GAGTACGATGATTGGTAAACGCGT  |
| <b>CsgAYW</b> | GGTACCATGAAACTTTTAAAAGTAGCAGCAATTGCAGCAATCGTATTCTCCGGTAGCGCTCTGGCAGGTGTTGTTCTCA<br>GTACGGCGGCGCGGTAACCACGGTGGTGGCGGTAATAATAGCGGCCAAATTCTGAGCTGAACATTTACCAGTACGG<br>TGGCGGTAACCTGCACTTGCTCTGCAAAGTATGCCCCGTAACCTGACTTGACTATTACCAGCATGGCGGCGGTAATG<br>GTGCAGATGTTGGTCAGGGCTCAGATGACAGCTCAATCGATCTGACCCAACGTGGCTTCGGTAACAGCGCTACTCTTGAT<br>CAGTGGAACGGCAAAAATTCTGAAATGACGGTTAAACAGTTCGGTGGTGGCAACGGTGTGCAGTTGACCAGACTGCA<br>TCTAACTCCTCCGTCAACGTGACTCAGGTTGGCTTTGGTAACAACGCGACCGCTCATCAGTACTACTATCGAAATACAAA<br>GAGTGGGATGATTATTAACGCGT   |

**Table 2-** Primers that were used in this study

|               |                                                               |                                                                                                                                            |
|---------------|---------------------------------------------------------------|--------------------------------------------------------------------------------------------------------------------------------------------|
| EK F-W        | GGTACCATGAAACTTTTAAAAGTAGCAGCAATTGC                           | Forward primer for all the PCR reactions                                                                                                   |
| EK R-csgA-W1  | TTCTTCCATTTACGCCACCACTACTGATGAGCGGTGCG<br>GTTGTTA             | First PCR reaction to amplify csgA gene fragment from pZa-TetO-csgA-CmR and to add conductive domain sequences to 3 prime of gene fragment |
| EK R-csgA-W2  | ACGCGTTTACCAGTCATCCATTCTTCCATTTACGCCAC<br>CAGTACTGATG         | Second PCR reaction to elongate conductive domain sequences to 3 prime of csgA gene fragment                                               |
| EK R-csgA-Y1  | CTCTTTGTATTTGCGATAGTAGTACTGATGAGCGGTGCG<br>GTTGTTA            | First PCR reaction to amplify csgA gene fragment from pZa-TetO-csgA-CmR and to add conductive domain sequences to 3 prime of gene fragment |
| EK R-csgA-Y2  | ACGCGTTTGTAGTATCATCATACTCTTTGTATTTGCGATA<br>GTAGTACTGATGAGCGG | Second PCR reaction to elongate conductive domain sequences to 3 prime of csgA gene fragment                                               |
| EK R-csgA-WY1 | CTCTTTGTATTTGCGATAGTAGTACTGATGAGCGGTGCG<br>GTTGTTA            | First PCR reaction to amplify csgA gene fragment from pZa-TetO-csgA-CmR and to add conductive domain sequences to 3 prime of gene fragment |
| EK R-csgA-WY2 | ACGCGTTTAAATAATCATCCACTCTTTGTATTTGCGATAG<br>TAGTACTGATGAGCGG  | Second PCR reaction to elongate conductive domain sequences to 3 prime of csgA gene fragment                                               |
| EK R-csgA-YW1 | CTCTTTGTATTTGCGATAGTAGTACTGATGAGCGGTGCG<br>GTTGTTA            | First PCR reaction to amplify csgA gene fragment from pZa-TetO-csgA-CmR and to add conductive domain sequences to 3 prime of gene fragment |
| EK R-csgA-YW2 | ACGCGTTTACCAATCATCGTACTCTTTGTATTTGCGATA<br>GTAGTACTGATGAGCGG  | Second PCR reaction to elongate conductive domain sequences to 3 prime of csgA gene fragment                                               |

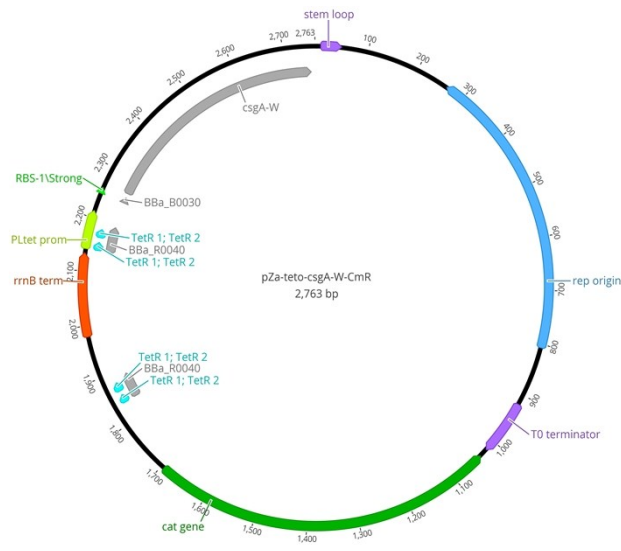

**Figure S2** Schematic representation of the expression vector containing the *csgAW* gene fragment

```

CTGGGCCCTTCTCGAGTCCCTATCAGTGATAGAGATTGACATCCCTATCAGTGATAGAGAT
CTGGGCCCTTCTCGAGTCCCTATCAGTGATAGAGATTGACATCCCTATCAGTGATAGAGAT
ACTGAGCACATCAGCAGGACGCACTGACCGAATCTACCATTACCTCTTGGATTTGGGT
ACTGAGCACATCAGCAGGACGCACTGACCGAATCTACCATTACCTCTTGGATTTGGGT
ATTAAGAGGAGAAAAGGTACCATGAAACTTTTAAAAGTAGCAGCAATTGCAGCAATCGTA
ATTAAGAGGAGAAAAGGTACCATGAAACTTTTAAAAGTAGCAGCAATTGCAGCAATCGTA
TTCTCCGGTAGCGCTCTGGCAGGTGTTGTTCCCTCAGTACGGCGGCGGCGTAACACGGT
TTCTCCGGTAGCGCTCTGGCAGGTGTTGTTCCCTCAGTACGGCGGCGGCGTAACACGGT
GGTGGCGGTAATAATAGCGGCCAAAATCTGAGCTGAACATTTACCAGTACGGTGGCGGT
GGTGGCGGTAATAATAGCGGCCAAAATCTGAGCTGAACATTTACCAGTACGGTGGCGGT
AACTCTGCACTTGCTCTGCAAACTGATGCCGTAACCTCTGACTTGACTATTACCCAGCAT
AACTCTGCACTTGCTCTGCAAACTGATGCCGTAACCTCTGACTTGACTATTACCCAGCAT
GGCGGCGGTAATGGTGACAGATGTTGGTCAGGGCTCAGATGACAGCTCAATCGATCTGACC
GGCGGCGGTAATGGTGACAGATGTTGGTCAGGGCTCAGATGACAGCTCAATCGATCTGACC
CAACGTGGCTTCGGTAACAGCGCTACTCTTGATCAGTGGAAACGGCAAAAATCTGAAATG
CAACGTGGCTTCGGTAACAGCGCTACTCTTGATCAGTGGAAACGGCAAAAATCTGAAATG
ACGGTTAAACAGTTTCGGTGGTGGCAACGGTGTGTCAGTTGACCAAGCTGCATCTAACTCC
ACGGTTAAACAGTTTCGGTGGTGGCAACGGTGTGTCAGTTGACCAAGCTGCATCTAACTCC
TCCGTCAACGTGACTCAGGTTGGCTTTGGTAAACACGGACCGCTCATCAGTACTGTTGG
TCCGTCAACGTGACTCAGGTTGGCTTTGGTAAACACGGACCGCTCATCAGTACTGTTGG
CGTAAATGAAAAGAAATGGGATGACTGGTAAACGCGT 2763
CGTAAATGAAAAGAAATGGGATGACTGGTAAACGCGT 650

```

**Figure S3** Sequence analysis of *csgAW* gene fragment. Upper DNA sequence is the reference and lower one is the cloned DNA sequence.

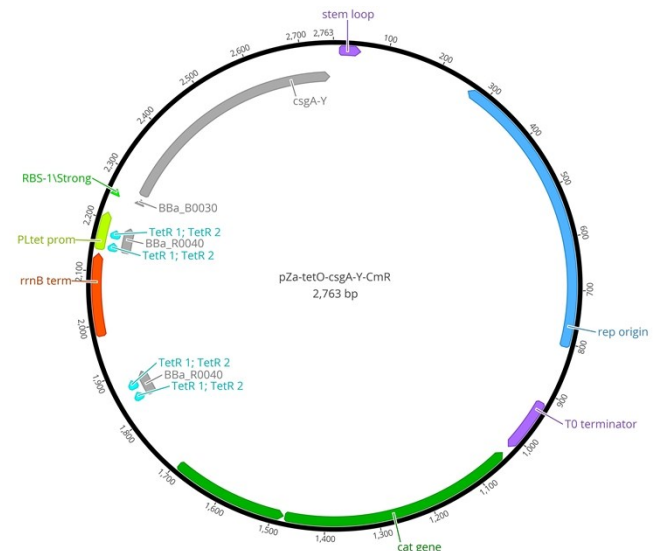

**Figure S4** Schematic representation of the expression vector containing *csgAY* gene fragment.

```

CTGGGCCCTTCTCGAGTCCCTATCAGTGATAGAGATTGACATCCCTATCAGTGATAGAGAT
CTGGGCCCTTCTCGAGTCCCTATCAGTGATAGAGATTGACATCCCTATCAGTGATAGAGAT
ACTGAGCACATCAGCAGGACGCACTGACCGAATCTACCATTACCTCTTGGATTTGGGT
ACTGAGCACATCAGCAGGACGCACTGACCGAATCTACCATTACCTCTTGGATTTGGGT
ATTAAGAGGAGAAAAGGTACCATGAAACTTTTAAAAGTAGCAGCAATTGCAGCAATCGTA
ATTAAGAGGAGAAAAGGTACCATGAAACTTTTAAAAGTAGCAGCAATTGCAGCAATCGTA
TTCTCCGGTAGCGCTCTGGCAGGTGTTGTTCCCTCAGTACGGCGGCGGCGTAACACGGT
TTCTCCGGTAGCGCTCTGGCAGGTGTTGTTCCCTCAGTACGGCGGCGGCGTAACACGGT
GGTGGCGGTAATAATAGCGGCCAAAATCTGAGCTGAACATTTACCAGTACGGTGGCGGT
GGTGGCGGTAATAATAGCGGCCAAAATCTGAGCTGAACATTTACCAGTACGGTGGCGGT
AACTCTGCACTTGCTCTGCAAACTGATGCCGTAACCTCTGACTTGACTATTACCCAGCAT
AACTCTGCACTTGCTCTGCAAACTGATGCCGTAACCTCTGACTTGACTATTACCCAGCAT
GGCGGCGGTAATGGTGACAGATGTTGGTCAGGGCTCAGATGACAGCTCAATCGATCTGACC
GGCGGCGGTAATGGTGACAGATGTTGGTCAGGGCTCAGATGACAGCTCAATCGATCTGACC
CAACGTGGCTTCGGTAACAGCGCTACTCTTGATCAGTGGAAACGGCAAAAATCTGAAATG
CAACGTGGCTTCGGTAACAGCGCTACTCTTGATCAGTGGAAACGGCAAAAATCTGAAATG
ACGGTTAAACAGTTTCGGTGGTGGCAACGGTGTGTCAGTTGACCAAGCTGCATCTAACTCC
ACGGTTAAACAGTTTCGGTGGTGGCAACGGTGTGTCAGTTGACCAAGCTGCATCTAACTCC
TCCGTCAACGTGACTCAGGTTGGCTTTGGTAAACACGGACCGCTCATCAGTACTACTAT
TCCGTCAACGTGACTCAGGTTGGCTTTGGTAAACACGGACCGCTCATCAGTACTACTAT
CGCAAAATACAAAGAGTATGATGACTACTAAACGCGT 2763
CGCAAAATACAAAGAGTATGATGACTACTAAACGCGT 651

```

**Figure S5** Sequence analysis of *csgAY* gene fragment. Upper DNA sequence is the reference and lower one is the cloned DNA sequence.

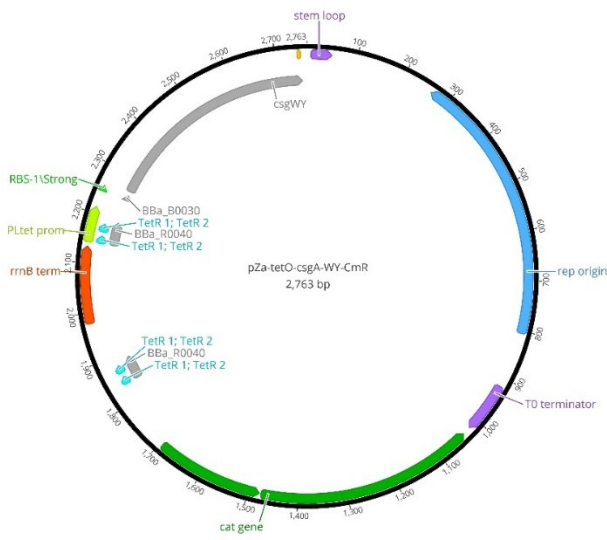

**Figure S6** Schematic representation of the expression vector containing the *csgAWY* gene fragment.

```

TGGGCTTCTCGAGTCCCTATCAGTGATAGAGATTGACATCCCTATCAGTGATAGAGATA
TGGGCTTCTCGAGTCCCTATCAGTGATAGAGATTGACATCCCTATCAGTGATAGAGATA
CTGAGCACATCAGCAGGACGCACTGACCGAATTCTACCATTACCTCTTGGATTTGGGTA
CTGAGCACATCAGCAGGACGCACTGACCGAATTCTACCATTACCTCTTGGATTTGGGTA
TTAAAGAGGAGAAAAGGTACCATGAACTTTTAAAAGTAGCAGCAATTGCAGCAATCGTAT
TTAAAGAGGAGAAAAGGTACCATGAACTTTTAAAAGTAGCAGCAATTGCAGCAATCGTAT
TCTCCGGTAGCGCTCTGGCAGGTGTTGTTCCCTCAGTACGGCGGCGGCGGTAAACACGGTG
TCTCCGGTAGCGCTCTGGCAGGTGTTGTTCCCTCAGTACGGCGGCGGCGGTAAACACGGTG
GTGGCGGTAAATAATAGCGGCCCAAATTCAGACTGAACATTTACCAGTACGGTGGCGGTAA
GTGGCGGTAAATAATAGCGGCCCAAATTCAGACTGAACATTTACCAGTACGGTGGCGGTAA
ACTCTGCACTTGCTCTGCAAACTGATGCCGTAACCTGACTTGACTATTACCCAGCATG
ACTCTGCACTTGCTCTGCAAACTGATGCCGTAACCTGACTTGACTATTACCCAGCATG
GCGGCGGTAAATGTTGCAGATGTTGGTCAGGGCTCAGATGACAGCTCAATCGATCTGACCC
GCGGCGGTAAATGTTGCAGATGTTGGTCAGGGCTCAGATGACAGCTCAATCGATCTGACCC
AACGTGGCTTCGGTAAACAGCGCTACTCTTGATCAGTGGAAACGGCAAAAATCTGAAATGA
AACGTGGCTTCGGTAAACAGCGCTACTCTTGATCAGTGGAAACGGCAAAAATCTGAAATGA
CGGTTAAACAGTTTCGGTGGTGGCAACGGTGTGCAAGTTGACCAAGACTGCATCTAACTCCT
CGGTTAAACAGTTTCGGTGGTGGCAACGGTGTGCAAGTTGACCAAGACTGCATCTAACTCCT
CCGTCAACGTGACTCAGGTTGGCTTGGTAAACAGCGGACCGCTCATCAGTACTACTATC
CCGTCAACGTGACTCAGGTTGGCTTGGTAAACAGCGGACCGCTCATCAGTACTACTATC
GCAAATACAAAGAGTACGATGATTGGTAAACGCGT 2763
GCAAATACAAAGAGTACGATGATTGGTAAACGCGT 653

```

**Figure S7** Sequence analysis of *csgAWY* gene fragment. Upper DNA sequence is the reference and lower one is the cloned DNA sequence.

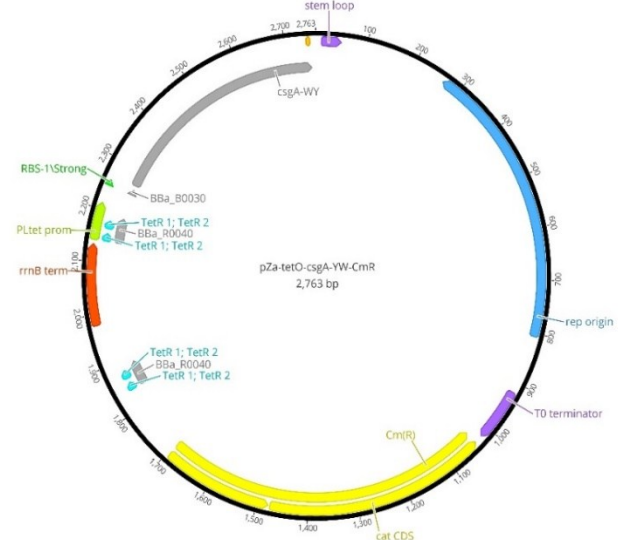

**Figure S8** Schematic representation of the expression vector containing the *csgAYW* gene fragment

```

ACTGGGCTTCTCGAGTCCCTATCAGTGATAGAGATTGACATCCCTATCAGTGATAGAGA
ACTGGGCTTCTCGAGTCCCTATCAGTGATAGAGATTGACATCCCTATCAGTGATAGAGA
TACTGAGCACATCAGCAGGACGCACTGACCGAATTCTACCATTACCTCTTGGATTTGGG
TACTGAGCACATCAGCAGGACGCACTGACCGAATTCTACCATTACCTCTTGGATTTGGG
TATTAAGAGGAGAAAAGGTACCATGAACTTTTAAAAGTAGCAGCAATTGCAGCAATCGT
TATTAAGAGGAGAAAAGGTACCATGAACTTTTAAAAGTAGCAGCAATTGCAGCAATCGT
ATTCTCCGGTAGCGCTCTGGCAGGTGTTGTTCCCTCAGTACGGCGGCGGCGGTAAACACGG
ATTCTCCGGTAGCGCTCTGGCAGGTGTTGTTCCCTCAGTACGGCGGCGGCGGTAAACACGG
TGGTGGCGGTAAATAATAGCGGCCCAAATTCAGACTGAACATTTACCAGTACGGTGGCGG
TGGTGGCGGTAAATAATAGCGGCCCAAATTCAGACTGAACATTTACCAGTACGGTGGCGG
TAACTCTGCACTTGCTCTGCAAACTGATGCCGTAACCTGACTTGACTATTACCCAGCA
TAACTCTGCACTTGCTCTGCAAACTGATGCCGTAACCTGACTTGACTATTACCCAGCA
TGGCGGCGGTAAATGTTGCAGATGTTGGTCAGGGCTCAGATGACAGCTCAATCGATCTGAC
TGGCGGCGGTAAATGTTGCAGATGTTGGTCAGGGCTCAGATGACAGCTCAATCGATCTGAC
CCACGTGGCTTCGGTAAACAGCGCTACTCTTGATCAGTGGAAACGGCAAAAATCTGAAAT
CCACGTGGCTTCGGTAAACAGCGCTACTCTTGATCAGTGGAAACGGCAAAAATCTGAAAT
GACGGTTAAACAGTTTCGGTGGTGGCAACGGTGTGCAAGTTGACCAAGACTGCATCTAACTC
GACGGTTAAACAGTTTCGGTGGTGGCAACGGTGTGCAAGTTGACCAAGACTGCATCTAACTC
CTCCGTCAACGTGACTCAGGTTGGCTTGGTAAACAGCGGACCGCTCATCAGTACTACTA
CTCCGTCAACGTGACTCAGGTTGGCTTGGTAAACAGCGGACCGCTCATCAGTACTACTA
TCGCAAAATACAAAGAGTGGGATGATTATTAACGCGT 2763
TCGCAAAATACAAAGAGTGGGATGATTATTAACGCGT 650

```

**Figure S9** Sequence analysis of *csgAYW* gene fragment. Upper DNA sequence is the reference and lower one is the cloned DNA sequence.

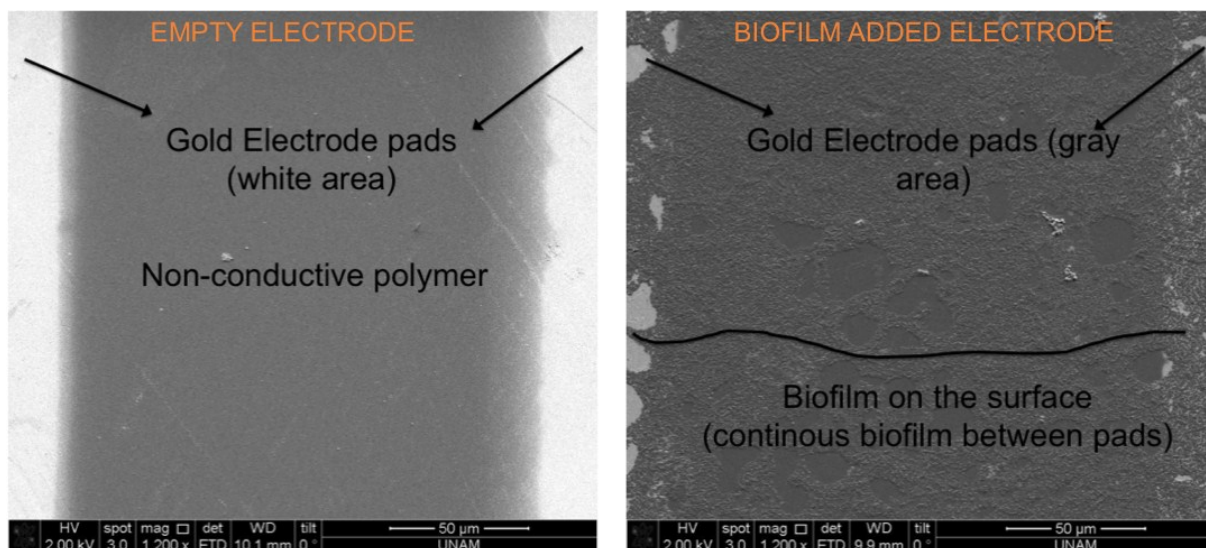

**Figure S10.** Interdigitated gold electrodes before and after the addition of the biofilms on surface for conductivity measurements.

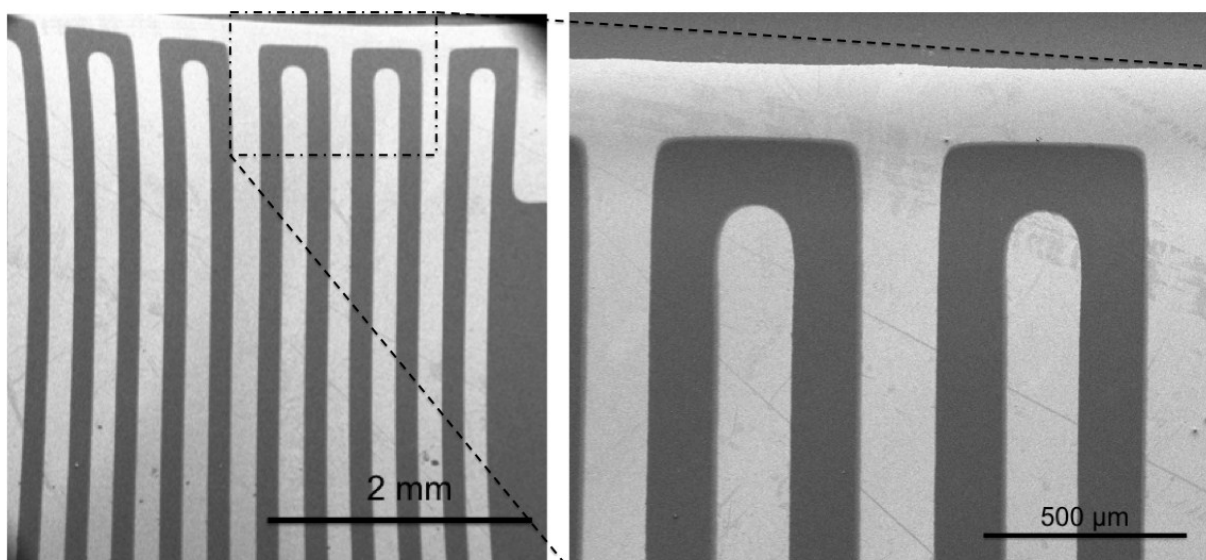

**Figure S11.** Empty interdigitated electrode and its detail showing the successful deposition of the gold through the mask used.

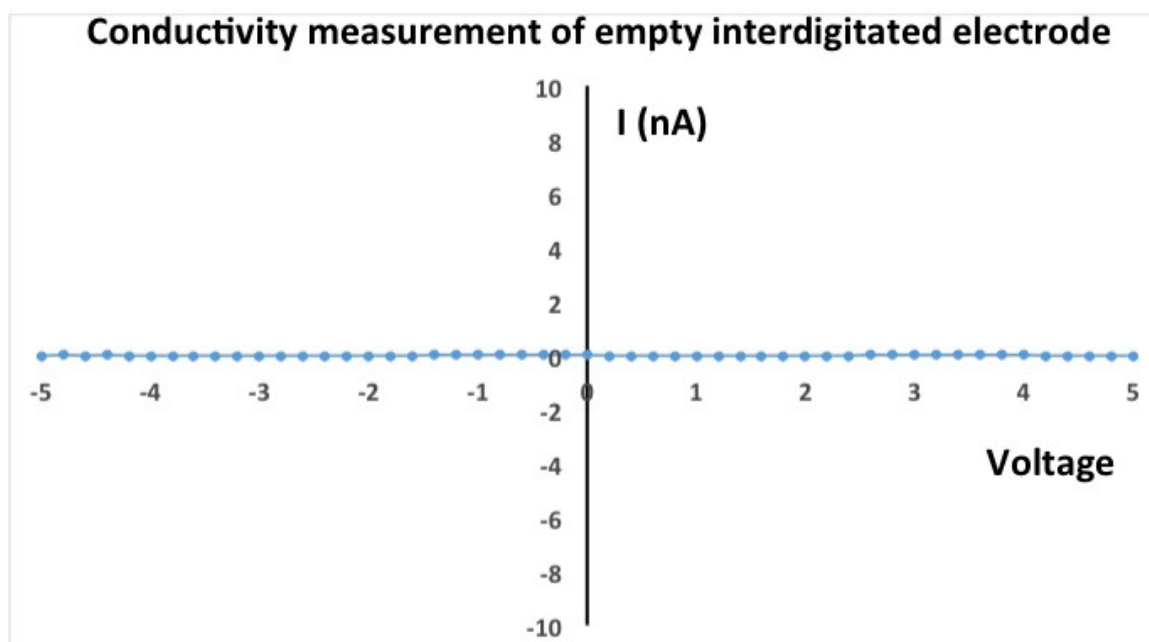

**Figure S12.** Conductivity measurement of the empty electrode
